# Supplementary material for: TLR9 Monotherapy in Immune-Competent Mice Suppresses Orthotopic Prostate Tumor Development
Source: MDPI journal article supplement (doi:10.3390/cells13010097), 2024-01-02
Supplement: s1 [file s1]

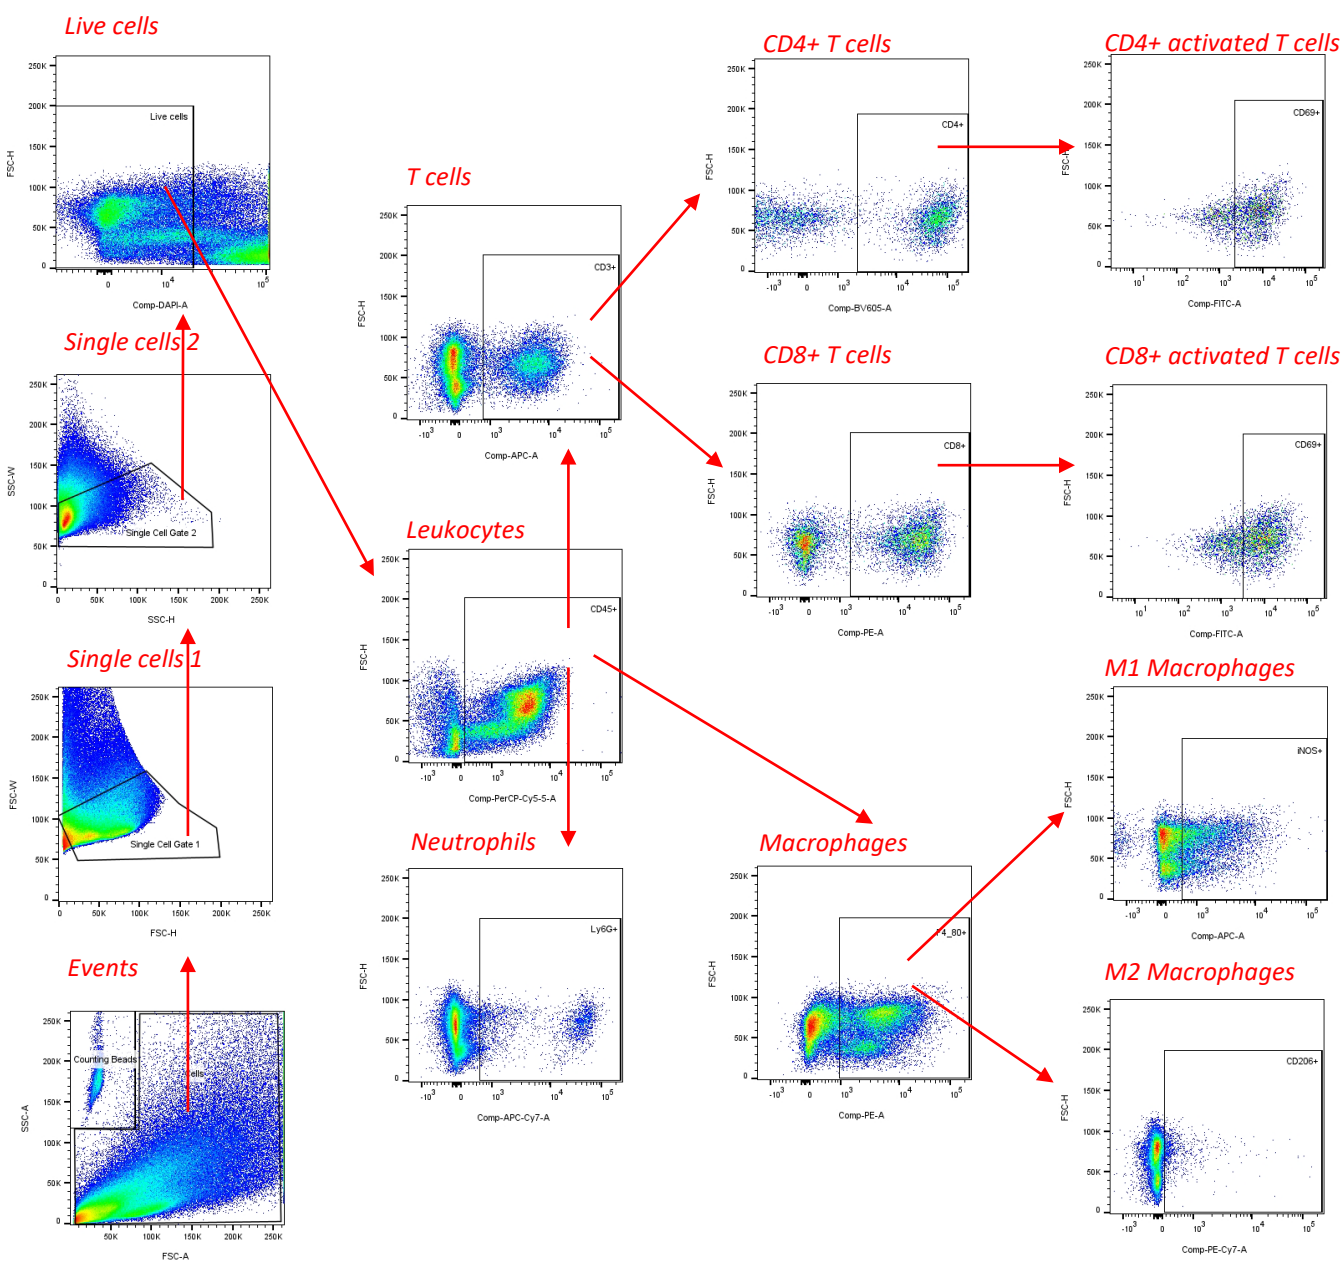

**Figure S1. Flow cytometry gating strategy.**

CD45+ leukocytes were gated from live cells and divided into CD3+ T cells, F4/80+ macrophages or Ly6G+ neutrophils. T cells were further subdivided into CD4+ (helper) or CD8+ (cytotoxic) T cells, and CD69+ co-staining performed to measure “activated” T cell subtypes. Macrophages were further subdivided into iNOS+ (M1) or CD206+ (M2) macrophages.

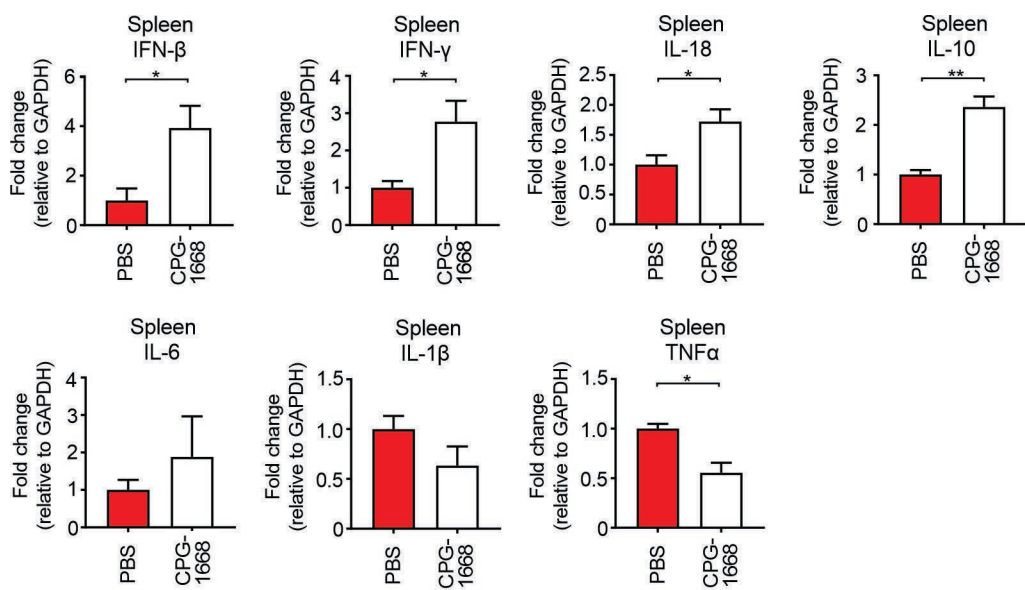

**Figure S2. CPG-1668 administration increases a subset of inflammatory genes in the spleen.**

C57BL6/J mice were treated with PBS or CPG-1668 (50  $\mu$ g/day) and spleens harvested after 3 days. QPCR analysis of various inflammatory genes was performed. Data is presented relative to GAPDH housekeeping and expressed relative to PBS controls. Data represent  $n = 3$  per group and expressed as mean  $\pm$  SEM. Statistical analysis was conducted using an unpaired, two-sided t-test (\*  $p < 0.05$ ).

**A**

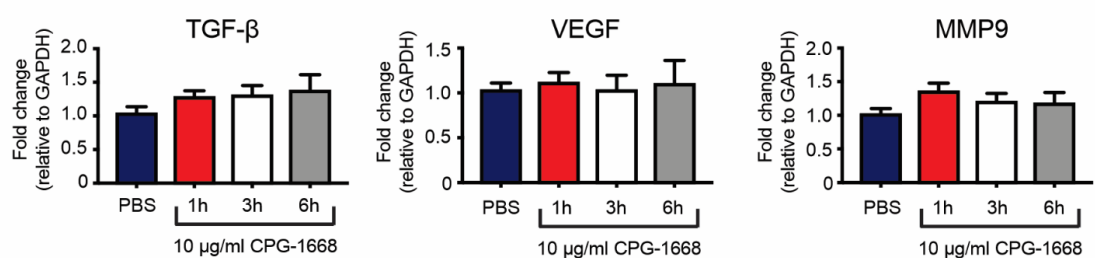

**B**

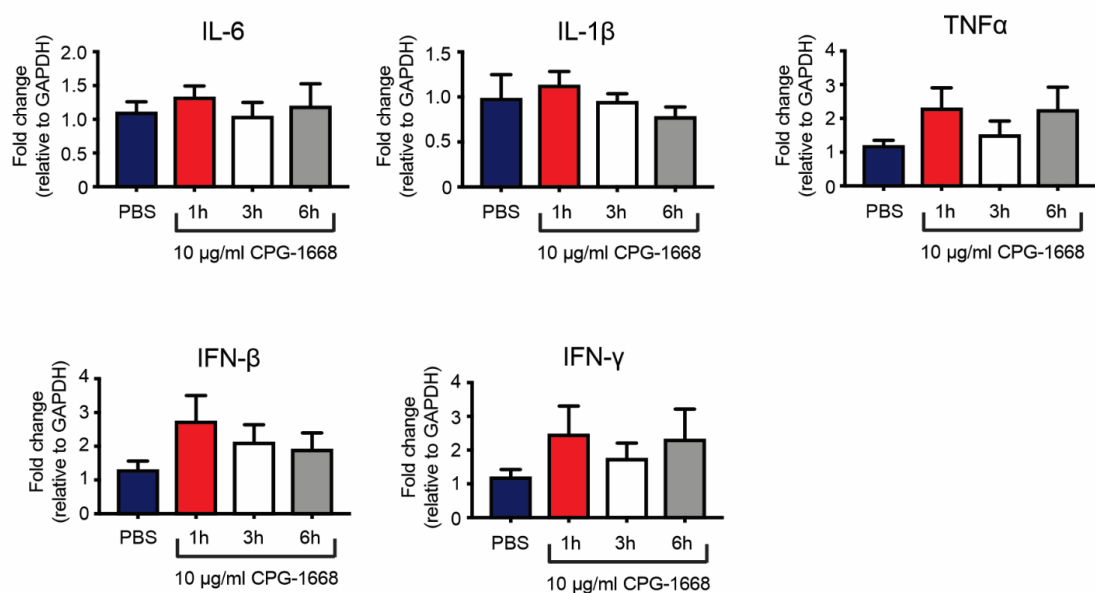

**Figure S3. TLR9 activation has no effect on tumour promoting or inflammatory markers in RM1 murine prostate cancer cells at early timepoints.**

RM1 prostate cancer cells were treated *in vitro* with PBS or 10  $\mu$ g/ml CPG-1668 for 1, 3 or 6 hours. QPCR analysis of (A) tumour promoting genes (MMP9, TGF- $\beta$  and VEGF) or (B) inflammatory genes (IL-6, IL-1 $\beta$ , TNF $\alpha$ , IFN- $\beta$  and IFN- $\gamma$ ) was performed. Data is presented relative to GAPDH housekeeping and expressed relative to PBS controls. Data represent n = 12-14 per group and expressed as mean  $\pm$  SEM. Statistical analysis was conducted using one-way ANOVA followed by Dunnett's post hoc test for multiple comparisons (statistical significance for all conditions was  $p > 0.05$ ).

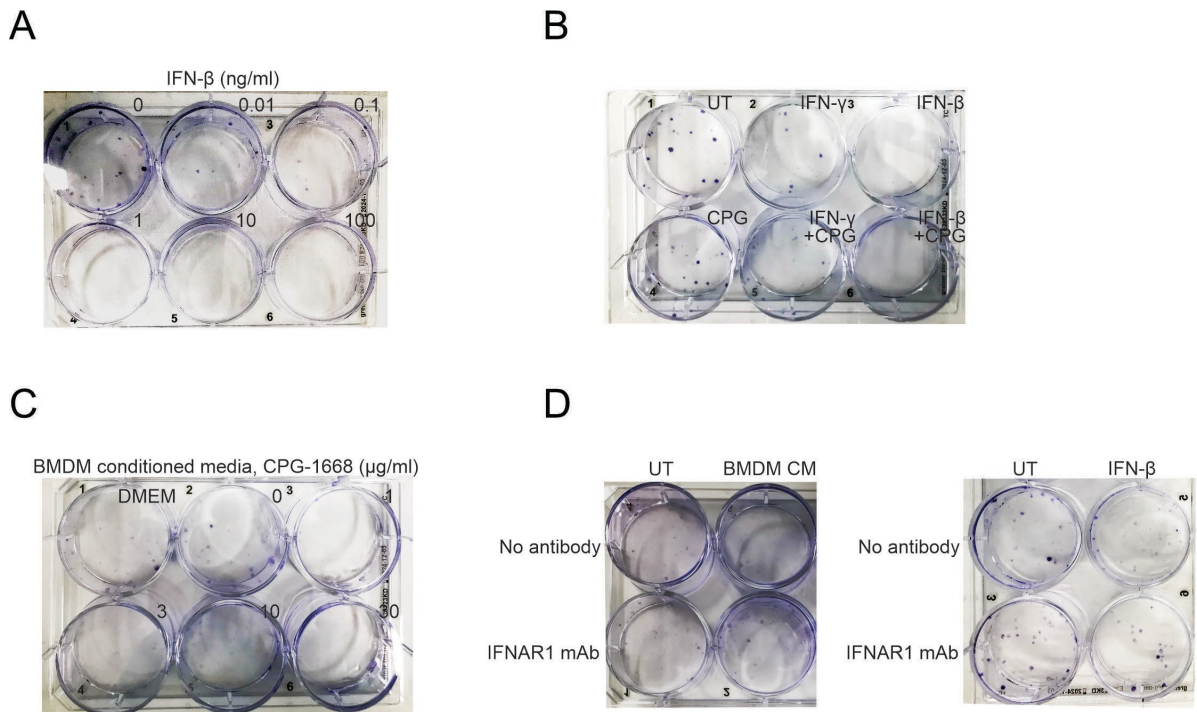

**Figure S4. Representative images of colony forming assays.**

RM1 prostate cancer cells were exposed to the following conditions for 24 hours: **(A)** increasing concentrations of recombinant IFN- $\beta$ , **(B)** CPG-1668 (10  $\mu$ g/mL), IFN- $\gamma$  (100 ng/mL) or IFN- $\beta$  (100 ng/mL) alone or in combination, **(C)** conditioned media (CM) from bone marrow-derived macrophages (BMDM) grown in increasing concentrations of CPG-1668 for 24 hours, or **(D)** pretreated or not with 50  $\mu$ g/mL IFNAR1 blocking monoclonal antibody for 1 hour before the addition of BMDM-derived CM or recombinant IFN- $\beta$  (1 ng/mL). After exposure, cells were seeded in 6-well plates in complete media then stained with crystal violet after 7-8 days.

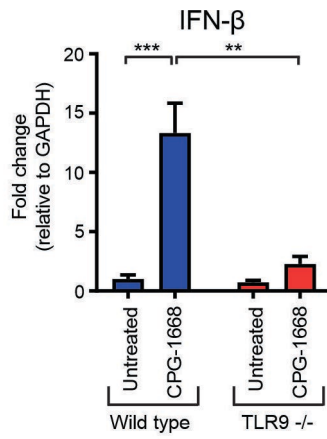

**Figure S5. CPG-1668 induces IFN- $\beta$  upregulation in macrophages via TLR9.**

Wild type or TLR9-deficient (TLR9 -/-) bone marrow-derived macrophages were treated *in vitro* with 1  $\mu$ g/ml CPG-1668 or not 24 hours, and IFN- $\beta$  gene expression was performed. Data is presented relative to GAPDH housekeeping and expressed relative to untreated wild type controls. Data represent  $n = 3$  per group and expressed as mean  $\pm$  SEM. Statistical analysis was conducted using two-way ANOVA followed by Tukey's post hoc test for multiple comparisons (\*\*  $p < 0.01$  \*\*\*  $p < 0.001$ ).
