# Supplementary material for: TLR9 Monotherapy in Immune-Competent Mice Suppresses Orthotopic Prostate Tumor Development
Source: Cells. 2024 Jan 2;13(1):97. doi: 10.3390/cells13010097 (PMC10778079; doi:10.3390/cells13010097)
Supplement: Supplementary file 1 [file cells-13-00097-s001.zip › Miles et al (Cells) Table of p-values.xlsx]

## Sheet: Fig 1
	Ordinary one-way ANOVA
Fig 1A - Prostate	Tukey's multiple comparisons test	Summary	Adjusted P Value
	SHAM+PBS vs. RM1+PBS	****	<0.0001
	SHAM+PBS vs. RM1+CPG (50ug/day)	**	0.005
	SHAM+PBS vs. RM1 (pre-treat) +PBS	****	<0.0001
	RM1+PBS vs. RM1+CPG (50ug/day)	**	0.0039
	RM1+PBS vs. RM1 (pre-treat) +PBS	ns	0.5232
	RM1+CPG (50ug/day) vs. RM1 (pre-treat) +PBS	**	0.002
Fig 1B - Spleen	Tukey's multiple comparisons test	Summary	Adjusted P Value
	SHAM+PBS vs. RM1+PBS	ns	0.7696
	SHAM+PBS vs. RM1+CPG (50ug/day)	****	<0.0001
	SHAM+PBS vs. RM1 (pre-treat) +PBS	ns	0.9654
	RM1+PBS vs. RM1+CPG (50ug/day)	****	<0.0001
	RM1+PBS vs. RM1 (pre-treat) +PBS	ns	0.9968
	RM1+CPG (50ug/day) vs. RM1 (pre-treat) +PBS	****	<0.0001
Fig 1C - Bodyweight	Tukey's multiple comparisons test	Summary	Adjusted P Value
	SHAM+PBS vs. RM1+PBS	ns	0.9888
	SHAM+PBS vs. RM1+CPG (50ug/day)	ns	0.7414
	SHAM+PBS vs. RM1 (pre-treat) +PBS	ns	0.574
	RM1+PBS vs. RM1+CPG (50ug/day)	ns	0.8951
	RM1+PBS vs. RM1 (pre-treat) +PBS	ns	0.7063
	RM1+CPG (50ug/day) vs. RM1 (pre-treat) +PBS	ns	0.939

## Sheet: Fig 2-4
Fig 2 - Prostate					Fig 3 - Blood					Fig 4 - Spleen
Unpaired t test: PBS vs CPG-1668	Summary	P-value			Unpaired t test: PBS vs CPG-1668	Summary	P-value			Unpaired t test: PBS vs CPG-1668	Summary	P-value
Prostate CD45+	****	<0.0001			Blood CD45+	ns	0.7395			Spleen CD45+	**	0.0012
Prostate CD45+ CD3+	***	0.0002			Blood CD45+ CD3+	ns	0.9594			Spleen CD45+ CD3+	ns	0.3842
Prostate CD45+ CD4+	***	0.0007			Blood CD45+ CD4+	ns	0.1368			Spleen CD45+ CD4+	ns	0.596
Prostate CD45+ CD4+ CD69+	***	0.0005			Blood CD45+ CD4+ CD69+	***	0.0007			Spleen CD45+ CD4+ CD69+	ns	0.2026
Prostate CD45+ CD8+	***	0.0003			Blood CD45+ CD8+	ns	0.1102			Spleen CD45+ CD8+	ns	0.2229
Prostate CD45+ CD8+ CD69+	**	0.0011			Blood CD45+ CD8+ CD69+	ns	0.109			Spleen CD45+ CD8+ CD69+	ns	0.2314
Prostate CD8+:CD4+	*	0.0144			Blood CD8+:CD4+	****	<0.0001			Spleen CD8+:CD4+	****	<0.0001
Prostate CD8+ CD69+:CD4+ CD69+	*	0.0375			Blood CD8+ CD69+:CD4+ CD69+	****	<0.0001			Spleen CD8+ CD69+:CD4+ CD69+	ns	0.8359
Prostate CD45+ F4/80+	**	0.0037			Blood CD45+ F4/80+	**	0.0083			Spleen CD45+ F4/80+	****	<0.0001
Prostate CD45+ F4/80+ iNOS+	**	0.0019			Blood CD45+ F4/80+ iNOS+	*	0.0202			Spleen CD45+ F4/80+ iNOS+	****	<0.0001
Prostate CD45+ F4/80+ CD206+	ns	0.7505			Blood CD45+ F4/80+ CD206+	***	0.0006			Spleen CD45+ F4/80+ CD206+	**	0.0011
Prostate M1:M2	ns	0.7076			Blood M1:M2	ns	0.3456			Spleen M1:M2	**	0.0034
Prostate CD45+ Ly6G+	ns	0.8333			Blood CD45+ Ly6G+	*	0.0332			Spleen CD45+ Ly6G+	****	<0.0001
%Prostate CD45+	**	0.0012			%Blood CD45+	ns	0.2029			%Spleen CD45+	***	0.0001
%Prostate CD45+ CD3+	****	<0.0001			%Blood CD45+ CD3+	ns	0.7572			%Spleen CD45+ CD3+	****	<0.0001
%Prostate CD45+ CD4+	****	<0.0001			%Blood CD45+ CD4+	**	0.0043			%Spleen CD45+ CD4+	****	<0.0001
%Prostate CD45+ CD4+ CD69+	***	0.0002			%Blood CD45+ CD4+ CD69+	**	0.0041			%Spleen CD45+ CD4+ CD69+	*	0.0114
%Prostate CD45+ CD8+	****	<0.0001			%Blood CD45+ CD8+	**	0.0041			%Spleen CD45+ CD8+	**	0.0013
%Prostate CD45+ CD8+ CD69+	***	0.0004			%Blood CD45+ CD8+ CD69+	****	<0.0001			%Spleen CD45+ CD8+ CD69+	**	0.001
%Prostate CD45+ F4/80+	ns	0.2164			%Blood CD45+ F4/80+	****	<0.0001			%Spleen CD45+ F4/80+	****	<0.0001
%Prostate CD45+ F4/80+ iNOS+	ns	0.8258			%Blood CD45+ F4/80+ iNOS+	****	<0.0001			%Spleen CD45+ F4/80+ iNOS+	****	<0.0001
%Prostate CD45+ F4/80+ CD206+	**	0.0064			%Blood CD45+ F4/80+ CD206+	****	<0.0001			%Spleen CD45+ F4/80+ CD206+	*	0.0105
%Prostate CD45+ Ly6G+	*	0.0353			%Blood CD45+ Ly6G+	**	0.0085			%Spleen CD45+ Ly6G+	****	<0.0001

## Sheet: Fig 5
Fig 5A	Ordinary one-way ANOVA					Fig 5B	Ordinary one-way ANOVA					Fig 5C
RM1 IL-6	Dunnett's multiple comparisons test	Summary	Adjusted P Value			RM1 MMP9	Dunnett's multiple comparisons test	Summary	Adjusted P Value			Unpaired t test	Summary	P-value
	0 vs. 1	ns	0.9839				0 vs. 1	ns	0.9945			WB: RM1 vs BMDM	0.5628	ns
	0 vs. 3	ns	0.7136				0 vs. 3	ns	0.9999
	0 vs. 10	ns	>0.9999				0 vs. 10	ns	0.9929			Fig 5D
	0 vs. 30	ns	0.598				0 vs. 30	ns	0.4453			Unpaired t test	Summary	P-value
												surface: RM1 vs BMDM	0.5127	ns
RM1 IL-1β	Dunnett's multiple comparisons test	Summary	Adjusted P Value			RM1 TGF-β	Dunnett's multiple comparisons test	Summary	Adjusted P Value			intracellular: RM1 vs BMDM	0.856	ns
	0 vs. 1	ns	0.8498				0 vs. 1	ns	0.9054
	0 vs. 3	ns	0.9993				0 vs. 3	ns	0.9999
	0 vs. 10	ns	>0.9999				0 vs. 10	ns	0.9997
	0 vs. 30	***	0.0006				0 vs. 30	ns	0.9918
RM1 TNFα	Dunnett's multiple comparisons test	Summary	Adjusted P Value			RM1 VEGF	Dunnett's multiple comparisons test	Summary	Adjusted P Value
	0 vs. 1	ns	0.9979				0 vs. 1	ns	0.977
	0 vs. 3	ns	>0.9999				0 vs. 3	ns	0.8721
	0 vs. 10	ns	0.9244				0 vs. 10	ns	0.9719
	0 vs. 30	ns	0.2062				0 vs. 30	ns	0.4063
RM1 IFN-β	Dunnett's multiple comparisons test	Summary	Adjusted P Value			RM1 NFκB	Dunnett's multiple comparisons test	Summary	Adjusted P Value
	0 vs. 1	ns	0.9021				0 vs. 1	ns	0.7877
	0 vs. 3	ns	0.8259				0 vs. 3	ns	0.9999
	0 vs. 10	ns	0.8443				0 vs. 10	ns	0.9904
	0 vs. 30	ns	0.3428				0 vs. 30	ns	0.4236
RM1 IFN-γ	Dunnett's multiple comparisons test	Summary	Adjusted P Value			RM1 STAT3	Dunnett's multiple comparisons test	Summary	Adjusted P Value
	0 vs. 1	ns	0.9988				0 vs. 1	ns	0.9999
	0 vs. 3	ns	0.9489				0 vs. 3	ns	0.9978
	0 vs. 10	ns	0.9316				0 vs. 10	ns	0.9999
	0 vs. 30	ns	0.6125				0 vs. 30	ns	0.9999
BMDM IL-6	Dunnett's multiple comparisons test	Summary	Adjusted P Value			BMDM MMP9	Dunnett's multiple comparisons test	Summary	Adjusted P Value
	0 vs. 1	**	0.0032				0 vs. 1	ns	0.9967
	0 vs. 3	**	0.0089				0 vs. 3	ns	0.9997
	0 vs. 10	**	0.0058				0 vs. 10	ns	0.8714
	0 vs. 30	***	0.0005				0 vs. 30	ns	0.9976
BMDM IL-1β	Dunnett's multiple comparisons test	Summary	Adjusted P Value			BMDM TGF-β	Dunnett's multiple comparisons test	Summary	Adjusted P Value
	0 vs. 1	*	0.0284				0 vs. 1	ns	0.9911
	0 vs. 3	*	0.0472				0 vs. 3	ns	0.3845
	0 vs. 10	*	0.0314				0 vs. 10	ns	0.9681
	0 vs. 30	*	0.0355				0 vs. 30	ns	0.4038
BMDM TNFα	Dunnett's multiple comparisons test	Summary	Adjusted P Value			BMDM VEGF	Dunnett's multiple comparisons test	Summary	Adjusted P Value
	0 vs. 1	ns	0.19				0 vs. 1	ns	0.9999
	0 vs. 3	ns	0.7917				0 vs. 3	ns	>0.9999
	0 vs. 10	ns	0.4072				0 vs. 10	ns	0.9999
	0 vs. 30	ns	0.2757				0 vs. 30	ns	0.9981
BMDM IFN-β	Dunnett's multiple comparisons test	Summary	Adjusted P Value			BMDM NFκB	Dunnett's multiple comparisons test	Summary	Adjusted P Value
	0 vs. 1	*	0.0134				0 vs. 1	ns	0.1306
	0 vs. 3	**	0.0066				0 vs. 3	**	0.0062
	0 vs. 10	**	0.0049				0 vs. 10	*	0.014
	0 vs. 30	**	0.0012				0 vs. 30	ns	0.0635
BMDM IFN-γ	Dunnett's multiple comparisons test	Summary	Adjusted P Value			BMDM STAT3	Dunnett's multiple comparisons test	Summary	Adjusted P Value
	0 vs. 1	ns	>0.9999				0 vs. 1	ns	0.9882
	0 vs. 3	ns	0.5521				0 vs. 3	ns	0.9999
	0 vs. 10	ns	0.5322				0 vs. 10	ns	0.9983
	0 vs. 30	ns	0.9833				0 vs. 30	ns	>0.9999

## Sheet: Fig 6
	Ordinary one-way ANOVA
Fig 6A	Dunnett's multiple comparisons test	Summary	Adjusted P Value
	0 vs. 1	ns	0.8232
	0 vs. 3	ns	0.9974
	0 vs. 10	ns	0.982
	0 vs. 30	ns	0.9983
Fig 6B	Dunnett's multiple comparisons test	Summary	Adjusted P Value
	0 vs. 1	ns	0.3579
	0 vs. 3	ns	0.6185
	0 vs. 10	ns	0.9434
	0 vs. 30	ns	0.5353
Fig 6C	Two-way ANOVA
RM1	Šídák's multiple comparisons test	Summary	Adjusted P Value
	PBS vs CPG-1668
	0h	ns	>0.9999
	24h	ns	>0.9999
	48h	ns	0.9875
	72h	ns	0.8619
LNCAP	Šídák's multiple comparisons test	Summary	Adjusted P Value
	PBS vs CPG-1668
	0h	ns	>0.9999
	24h	ns	0.9816
	48h	ns	0.8438
	72h	ns	0.8695
PNT1A	Šídák's multiple comparisons test	Summary	Adjusted P Value
	PBS vs CPG-1668
	0h	ns	>0.9999
	24h	ns	0.9996
	48h	ns	0.8341
	72h	ns	0.539

## Sheet: Fig 7
Fig 7A	Two-way ANOVA					Fig 7B	Two-way ANOVA					Fig 7D	Ordinary one-way ANOVA					Fig 7H	Two-way ANOVA
IFN-γ	Šídák's multiple comparisons test	Summary	Adjusted P Value				Šídák's multiple comparisons test	Summary	Adjusted P Value			IFN-G clono	Dunnett's multiple comparisons test	Summary	Adjusted P Value			Clono: No Ab vs with IFNAR1 mAb	Šídák's multiple comparisons test	Summary	Adjusted P Value
	24h						24h						0 vs. 0.01	ns	0.9998				Untreated	ns	0.9987
	0 vs. 0.01	ns	0.8145				0 vs. 0.01	ns	0.9976				0 vs. 0.1	ns	0.9997				IFN-B	*	0.0456
	0 vs. 0.1	ns	0.854				0 vs. 0.1	ns	0.999				0 vs. 1	ns	0.9431				CM UT	ns	0.9999
	0 vs. 1	ns	>0.9999				0 vs. 1	ns	0.7763				0 vs. 10	ns	0.3311				CM+CPG	**	0.0083
	0 vs. 10	ns	0.9932				0 vs. 10	ns	0.7045				0 vs. 100	ns	0.0637
	0 vs. 100	ns	0.8949				0 vs. 100	ns	0.4916									Proliferation: No Ab vs with IFNAR1 mAb	Šídák's multiple comparisons test	Summary	Adjusted P Value
												IFN-B clono	Dunnett's multiple comparisons test	Summary	Adjusted P Value				Untreated	ns	0.9907
	48h						48h						0 vs. 0.01	ns	0.395				IFN-B	*	0.0326
	0 vs. 0.01	ns	>0.9999				0 vs. 0.01	ns	0.5315				0 vs. 0.1	*	0.0279				CM UT	ns	>0.9999
	0 vs. 0.1	ns	0.9896				0 vs. 0.1	ns	0.0773				0 vs. 1	*	0.0177				CM+CPG	*	0.0455
	0 vs. 1	ns	0.9973				0 vs. 1	ns	0.0745				0 vs. 10	**	0.001
	0 vs. 10	ns	0.9166				0 vs. 10	ns	0.0946				0 vs. 100	**	0.0022
	0 vs. 100	ns	0.997				0 vs. 100	ns	0.0909
												TNFa clono	Dunnett's multiple comparisons test	Summary	Adjusted P Value
	72h						72h						0 vs. 0.01	ns	0.9215
	0 vs. 0.01	ns	0.9074				0 vs. 0.01	ns	0.9973				0 vs. 0.1	ns	>0.9999
	0 vs. 0.1	ns	0.8605				0 vs. 0.1	ns	>0.9999				0 vs. 1	ns	>0.9999
	0 vs. 1	ns	0.9942				0 vs. 1	ns	0.9426				0 vs. 10	ns	0.9513
	0 vs. 10	ns	0.5762				0 vs. 10	ns	0.907				0 vs. 100	ns	0.973
	0 vs. 100	ns	0.991				0 vs. 100	ns	0.3646
IFN-β	Šídák's multiple comparisons test	Summary	Adjusted P Value									Fig 7E	Ordinary one-way ANOVA
	24h					Fig 7C	Two-way ANOVA						Dunnett's multiple comparisons test	Summary	Adjusted P Value
	0 vs. 0.01	ns	>0.9999				Šídák's multiple comparisons test	Summary	Adjusted P Value				Untreated vs. CPG	ns	0.9259
	0 vs. 0.1	ns	0.9984				24h						Untreated vs. IFN-γ	ns	0.2957
	0 vs. 1	ns	0.9369				0 vs. 0.01	ns	>0.9999				Untreated vs. IFN-γ+CPG	ns	0.9998
	0 vs. 10	ns	0.9932				0 vs. 0.1	ns	0.9832				Untreated vs. IFN-β	**	0.0015
	0 vs. 100	ns	0.8644				0 vs. 1	ns	>0.9999				Untreated vs. IFN-β+CPG	*	0.0441
							0 vs. 10	ns	0.9998
	48h						0 vs. 100	ns	0.9996
	0 vs. 0.01	ns	0.2258									Fig 7F	Ordinary one-way ANOVA
	0 vs. 0.1	ns	0.1911				48h						Dunnett's multiple comparisons test	Summary	Adjusted P Value
	0 vs. 1	ns	0.0893				0 vs. 0.01	*	0.0354				0 vs. 1	***	0.0006
	0 vs. 10	*	0.0357				0 vs. 0.1	**	0.0098				0 vs. 3	***	0.0008
	0 vs. 100	*	0.0259				0 vs. 1	***	0.0006				0 vs. 10	*	0.0194
							0 vs. 10	****	<0.0001				0 vs. 30	***	0.001
	72h						0 vs. 100	****	<0.0001
	0 vs. 0.01	*	0.0162
	0 vs. 0.1	*	0.0267				72h					Fig 7G	Ordinary one-way ANOVA
	0 vs. 1	**	0.0076				0 vs. 0.01	***	0.0002				Dunnett's multiple comparisons test	Summary	Adjusted P Value
	0 vs. 10	**	0.0023				0 vs. 0.1	****	<0.0001				0 vs. 1	*	0.0166
	0 vs. 100	***	0.0006				0 vs. 1	****	<0.0001				0 vs. 3	**	0.0066
							0 vs. 10	****	<0.0001				0 vs. 10	**	0.0058
TNFα	Šídák's multiple comparisons test	Summary	Adjusted P Value				0 vs. 100	****	<0.0001				0 vs. 30	***	0.0003
	24h
	0 vs. 0.01	ns	>0.9999
	0 vs. 0.1	ns	>0.9999
	0 vs. 1	ns	0.5047
	0 vs. 10	ns	0.9845
	0 vs. 100	ns	0.9862
	48h
	0 vs. 0.01	ns	0.9997
	0 vs. 0.1	ns	0.9795
	0 vs. 1	ns	>0.9999
	0 vs. 10	ns	0.9814
	0 vs. 100	ns	0.9995
	72h
	0 vs. 0.01	ns	>0.9999
	0 vs. 0.1	ns	0.9911
	0 vs. 1	ns	>0.9999
	0 vs. 10	ns	0.9996
	0 vs. 100	ns	0.9931

## Sheet: Supplementary Figs
Fig S2						Fig S3	Ordinary one-way ANOVA					Fig S5	Two-way ANOVA
	Unpaired t test: PBS vs CPG-1668	Summary	P-value			IL-6	Dunnett's multiple comparisons test	Summary	Adjusted P Value				Tukey's multiple comparisons test	Summary	Adjusted P Value
	IFN-β	*	0.0455				Control (PBS) vs. CPG 10ug/ml 1 h	ns	0.8368				0:WT vs. 0:TLR9ko	ns	0.9988
	IFN-γ	*	0.0392				Control (PBS) vs. CPG 10ug/ml 3 h	ns	0.9957				0:WT vs. 1:WT	***	0.0007
	IL-18	*	0.0434				Control (PBS) vs. CPG 10ug/ml 6 h	ns	0.9864				0:WT vs. 1:TLR9ko	ns	0.899
	IL-10	**	0.0043										0:TLR9ko vs. 1:WT	***	0.0006
	IL-6	ns	0.4748			IL-1β	Dunnett's multiple comparisons test	Summary	Adjusted P Value				0:TLR9ko vs. 1:TLR9ko	ns	0.8382
	IL-1β	ns	0.1912				Control (PBS) vs. CPG 10ug/ml 1 h	ns	0.8615				1:WT vs. 1:TLR9ko	**	0.0016
	TNFα	*	0.0164				Control (PBS) vs. CPG 10ug/ml 3 h	ns	0.9977
							Control (PBS) vs. CPG 10ug/ml 6 h	ns	0.6998
						IFN-β	Dunnett's multiple comparisons test	Summary	Adjusted P Value
							Control (PBS) vs. CPG 10ug/ml 1 h	ns	0.1863
							Control (PBS) vs. CPG 10ug/ml 3 h	ns	0.608
							Control (PBS) vs. CPG 10ug/ml 6 h	ns	0.7869
						TNFα	Dunnett's multiple comparisons test	Summary	Adjusted P Value
							Control (PBS) vs. CPG 10ug/ml 1 h	ns	0.2939
							Control (PBS) vs. CPG 10ug/ml 3 h	ns	0.9428
							Control (PBS) vs. CPG 10ug/ml 6 h	ns	0.3542
						IFN-γ	Dunnett's multiple comparisons test	Summary	Adjusted P Value
							Control (PBS) vs. CPG 10ug/ml 1 h	ns	0.419
							Control (PBS) vs. CPG 10ug/ml 3 h	ns	0.8977
							Control (PBS) vs. CPG 10ug/ml 6 h	ns	0.5179
						TGF-β	Dunnett's multiple comparisons test	Summary	Adjusted P Value
							Control (PBS) vs. CPG 10ug/ml 1 h	ns	0.571
							Control (PBS) vs. CPG 10ug/ml 3 h	ns	0.4935
							Control (PBS) vs. CPG 10ug/ml 6 h	ns	0.3178
						VEGF	Dunnett's multiple comparisons test	Summary	Adjusted P Value
							Control (PBS) vs. CPG 10ug/ml 1 h	ns	0.9733
							Control (PBS) vs. CPG 10ug/ml 3 h	ns	>0.9999
							Control (PBS) vs. CPG 10ug/ml 6 h	ns	0.9839
						MMP9	Dunnett's multiple comparisons test	Summary	Adjusted P Value
							Control (PBS) vs. CPG 10ug/ml 1 h	ns	0.1639
							Control (PBS) vs. CPG 10ug/ml 3 h	ns	0.5912
							Control (PBS) vs. CPG 10ug/ml 6 h	ns	0.6905
